# Supplementary material for: Appraisal Tools for Clinical Practice Guidelines: A Systematic Review
Source: PLOS journal article supplement (doi:10.1371/journal.pone.0082915), 2013-12-09
Supplement: S2 (10.1371/journal.pone.0082915.s002) [file journal.pone.0082915.s002]

## Supporting information 1 – Search strategy

### 1. EMBASE

#### Search interface: Ovid

- Embase 1980 to 2011 May 09

| #  | Searches                                                                      |
|----|-------------------------------------------------------------------------------|
| 1  | *Practice guideline/                                                          |
| 2  | (guideline or guidelines).ti.                                                 |
| 3  | 1 or 2                                                                        |
| 4  | (appraisal or appraised).ab.                                                  |
| 5  | (apprais* or quality or evaluation or evaluated or analysis or analysing).ti. |
| 6  | or/4-5                                                                        |
| 7  | (review or study).ab,ti.                                                      |
| 8  | evidence-based.ti.                                                            |
| 9  | (grade or grading or agree).ti,ab.                                            |
| 10 | Evidence based medicine/                                                      |
| 11 | Health care quality/                                                          |
| 12 | Health care policy/                                                           |
| 13 | Systematic review/                                                            |
| 14 | Review/                                                                       |
| 15 | Comparative study/                                                            |
| 16 | Controlled study/                                                             |
| 17 | or/7-16                                                                       |
| 18 | and/3,6,17                                                                    |
| 19 | 18 not medline*.cr.                                                           |
| 20 | limit 19 to yr="1995 -Current"                                                |
| 21 | limit 20 to (english or german)                                               |

## 2. MEDLINE

### Search interface: Ovid

- Ovid MEDLINE(R) 1948 to April Week 4 2011
- Ovid MEDLINE(R) Daily Update May 09, 2011
- Ovid MEDLINE(R) In-Process & Other Non-Indexed Citations May 09, 2011

| #  | Searches                                                                                                           |
|----|--------------------------------------------------------------------------------------------------------------------|
| 1  | *Practice Guidelines as Topic/                                                                                     |
| 2  | (guideline or guidelines).ti.                                                                                      |
| 3  | 1 or 2                                                                                                             |
| 4  | (appraisal or appraised).ab.                                                                                       |
| 5  | (apprais* or quality or evaluation or evaluated or analysis or analysing or comparison or valid or attributes).ti. |
| 6  | Practice Guidelines as Topic/st                                                                                    |
| 7  | Physician's Practice Patterns/st                                                                                   |
| 8  | or/4-7                                                                                                             |
| 9  | (review or study).ab,ti.                                                                                           |
| 10 | evidence-based.ti.                                                                                                 |
| 11 | (grade or grading or agree).ti,ab.                                                                                 |
| 12 | Evidence-Based Medicine/                                                                                           |
| 13 | Reproducibility of Results/                                                                                        |
| 14 | Quality Assurance, Health Care/                                                                                    |
| 15 | Evaluation Studies as Topic/                                                                                       |
| 16 | Quality of Health Care/                                                                                            |
| 17 | Guideline Adherence/                                                                                               |
| 18 | or/9-17                                                                                                            |
| 19 | and/3,8,18                                                                                                         |
| 20 | limit 19 to yr="1995 -Current"                                                                                     |
| 21 | limit 20 to (english or german)                                                                                    |

### 3. PubMed

#### Search interface: NLM

- PubMed - as supplied by publisher
- PubMed - in process
- PubMed – OLDMEDLINE
- PubMed - pubmednotmedline

| Search | Most Recent Queries                                                                                                                     |
|--------|-----------------------------------------------------------------------------------------------------------------------------------------|
| #1     | Search guideline[TI] OR guidelines[TI]                                                                                                  |
| #2     | Search apprais*[TIAB]                                                                                                                   |
| #3     | Search quality[TI] OR evaluation[TI] OR evaluated[TI] OR analysis[TI] OR analysing[TI] OR comparison[TI] OR valid[TI] OR attributes[TI] |
| #4     | Search review[TIAB] or study[TIAB]                                                                                                      |
| #5     | Search evidence-based[TI]                                                                                                               |
| #6     | Search grade[TIAB] or grading[TIAB] or agree[TIAB]                                                                                      |
| #7     | Search #1 AND (#2 OR #3) AND (#4 OR #5 OR #6)                                                                                           |
| #8     | Search #7 NOT medline[sb]                                                                                                               |
| #9     | Search Limits: Publication Date from 1995 to 2011                                                                                       |
| #10    | Search #8 AND #9 Limits: Publication Date from 1995 to 2011                                                                             |

## 4. The Cochrane Library

### Search interface: Wiley

- Cochrane Database of Systematic Reviews (Cochrane Reviews), Issue 4 2011
- Database of Abstracts of Reviews of Effects (Other Reviews), Issue 2, 2011
- Health Technology Assessment Database (Technology Assessments), Issue 2, 2011
- NHS Economic Evaluation Database, Issue 2, 2011
- Cochrane Methodology Register, Issue 2, 2011

| ID  | Search                                                                                                |
|-----|-------------------------------------------------------------------------------------------------------|
| #1  | MeSH descriptor Practice Guidelines as Topic, this term only                                          |
| #2  | (guideline or guidelines):ti                                                                          |
| #3  | (#1 OR #2)                                                                                            |
| #4  | apprais*:ab,ti                                                                                        |
| #5  | (quality or evaluation or evaluated or analysis or analysing or comparison or valid or attributes):ti |
| #6  | MeSH descriptor Practice Guidelines as Topic explode all trees with qualifier: ST                     |
| #7  | MeSH descriptor Physician's Practice Patterns explode all trees with qualifier: ST                    |
| #8  | (#4 OR #5 OR #6 OR #7)                                                                                |
| #9  | (review or study):ab,ti                                                                               |
| #10 | evidence-based:ti                                                                                     |
| #11 | (grade or grading or agree):ti,ab                                                                     |
| #12 | MeSH descriptor Evidence-Based Medicine, this term only                                               |
| #13 | MeSH descriptor Reproducibility of Results, this term only                                            |
| #14 | MeSH descriptor Quality Assurance, Health Care, this term only                                        |
| #15 | MeSH descriptor Evaluation Studies as Topic, this term only                                           |
| #16 | MeSH descriptor Quality of Health Care, this term only                                                |
| #17 | MeSH descriptor Guideline Adherence explode all trees                                                 |
| #18 | (#9 OR #10 OR #11 OR #12 OR #13 OR #14 OR #15 OR #16 OR #17)                                          |
| #19 | (#3 AND #8 AND #18)                                                                                   |
| #20 | (#19), from 1995 to 2011                                                                              |
